# Supplementary material for: The Mean of Milk: A Review of Human Milk Oligosaccharide Concentrations throughout Lactation
Source: MDPI journal article supplement (doi:10.3390/nu13082737), 2021-08-09
Supplement: s1 [file s1]

# The Mean of Milk: A Review of Human Milk Oligosaccharide Concentrations throughout Lactation

Buket Soyylmaz <sup>1,\*</sup>, Marta Hanna Mikš <sup>1,2</sup>, Christoph Hermann Röhrig <sup>1</sup>, Martin Matwiejuk <sup>1</sup>, Agnes Meszaros-Matwiejuk <sup>1</sup> and Louise Kristine Vigsnaes <sup>1,3</sup>

To understand the calculation of data into a pooled scenario, it is important to know that humans can be categorized into 4 distinct milk groups observed in various frequencies across populations. The milk groups are categorized according to the presence (or absence) of the specific oligosaccharide products of 2 distinct fucosyltransferase enzymes, namely  $\alpha$ 1,2- and  $\alpha$ 1,4 fucosyltransferase, encoded by the genes FUT2 and FUT3, respectively.

Milk group 1 is known as Lewis-positive secretor mothers with Lewis blood group (Lea- b+) expressing both FUT2 and FUT3 thus can synthesize both  $\alpha$ 1,2- and  $\alpha$ 1,4-fucosylated HMOs. Milk group 2 is Lewis-positive non-secretor mothers with Lewis blood group (Lea+ b-) expressing FUT3 but not FUT2 and thus produce  $\alpha$ 1,4-fucosylated HMOs but not  $\alpha$ 1,2-fucosylated HMOs. Milk group 3 is Lewis-negative secretor mothers with Lewis blood group (Le a- b-) expressing FUT2 but not FUT3 and therefore can synthesize  $\alpha$ 1,2-fucosylated but not  $\alpha$ 1,4-fucosylated HMOs.

**Citation:** Soyylmaz, B.; Mikš, M.H.; Röhrig, C.H.; Matwiejuk, M.; Meszaros-Matwiejuk, A.; Vigsnaes, L.K. The Mean of Milk: A Review of Human Milk Oligosaccharide Concentrations throughout Lactation. *Nutrients* **2021**, *13*, 2737. <https://doi.org/10.3390/nu13082737>

Finally, milk group 4 is Lewis-negative non-secretor mothers with Lewis blood group (Lea- b-) expressing neither FUT2 nor FUT 3 therefore cannot produce neither  $\alpha$ 1,2- not  $\alpha$ 1,4-fucosylated HMOs.

Table below illustrates the typically observed proportions of the four milk groups in humans. Some studies expressed concentration data simply as secretor (group 1+3) or non-secretor (2+4) while some studies distinctively categorized subjects by one of the four milk groups.

Academic Editor: Hans Demmelmaier

Table S1. Genetic background in population was used as the basis of the pooling calculations, where unpooled levels were converted into a pooled level using the below stated percentage ratios.

Received: 15 June 2021

Accepted: 22 July 2021

Published: 9 August 2021

**Publisher's Note:** MDPI stays neutral with regard to jurisdictional claims in published maps and institutional affiliations.

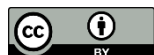

**Copyright:** © 2021 by the authors. Licensee MDPI, Basel, Switzerland. This article is an open access article distributed under the terms and conditions of the Creative Commons Attribution (CC BY) license (<http://creativecommons.org/licenses/by/4.0/>).

| Secretor Status | Secretor | Non-secretor | Secretor | Non-secretor |
|-----------------|----------|--------------|----------|--------------|
| Milk Group      | 1        | 2            | 3        | 4            |

| Milk Phenotype                                                               | Se+ / Le (a-b+)                                                                                                                                                 | Se- / Le (a+b-)                                                                                                  | Se+ / Le (a-b-)                                                                                                                                        | Se- / Le (a-b-)                                                                                 |
|------------------------------------------------------------------------------|-----------------------------------------------------------------------------------------------------------------------------------------------------------------|------------------------------------------------------------------------------------------------------------------|--------------------------------------------------------------------------------------------------------------------------------------------------------|-------------------------------------------------------------------------------------------------|
| <b><math>\alpha</math>1,2-fucosylated HMOs</b><br>(FUT2 enzyme)              | +                                                                                                                                                               | -                                                                                                                | +                                                                                                                                                      | -                                                                                               |
| <b><math>\alpha</math>1,3-fucosylated HMOs</b><br>(FUT3, FUT5, FUT6 enzymes) | +                                                                                                                                                               | +                                                                                                                | +                                                                                                                                                      | +                                                                                               |
| <b><math>\alpha</math>1,4-fucosylated HMOs</b><br>(FUT3 enzyme)              | +                                                                                                                                                               | +                                                                                                                | -                                                                                                                                                      | -                                                                                               |
| <b>Typically observed frequency</b>                                          | ~ %70                                                                                                                                                           | ~ %20                                                                                                            | ~ %9                                                                                                                                                   | ~ %1                                                                                            |
| <b>HMOs contained</b>                                                        | 2FL, LNFP I, LNDFH I, LNT, 3FL, DSLNT, LDFT, 6SL, LNFP III, DF-LNH I, LNFP II, LSTc, F-LNH II, LNnT, LNFP V, LNDFH II, 3SL, LSTa, F-LNH I, LNnH, LNH, LSTb, FSL | LNT, 3FL, DSLNT, 6SL, LNFP III, LNFP II, LSTc, F-LNH II, LNnT, LNFP V, LNDFH II, 3SL, LSTa, LNnH, LNH, LSTb, FSL | 2FL, LNFP I, LNT, 3FL, DSLNT, LDFT, 6SL, LNFP III, LNFP II, DF-LNH I, LSTc, F-LNH II, LNnT, LNFP V, LNDFH II, 3SL, LSTa, F-LNH I, LNnH, LNH, LSTb, FSL | LNT, 3FL, DSLNT, 6SL, LNFP III, LSTc, F-LNH II, LNnT, LNFP V, 3SL, , LSTa, LNnH, LNH, LSTb, FSL |

1. When Lewis milk group was not given, secretor (Lewis group 1+3) values were multiplied by 0.8 (80% of the population), and non-secretor (Lewis group 2+4) values were multiplied by 0.2 (20% of the population). This calculation was followed only for the FUT2 dependent HMOs: 2'-FL, LNFP I, LNDFH I, LDFT, DF-LNH I (a), F-LNH I, FS-LNH, S-LNFP I, TF-LNH, DF-LNH III (c).

| Paper                               | Sample | Country   | Lactation phase | Milk group | Milk type    | 2'-FL |
|-------------------------------------|--------|-----------|-----------------|------------|--------------|-------|
| <i>Sprenger et al. PlosOne 2017</i> | 34     | Singapore | 10 - 60 days    | 1+3        | Secretor     | 2.170 |
| <i>Sprenger et al. PlosOne 2017</i> | 34     | Singapore | 10 - 60 days    | 2+4        | Non-secretor | 0.026 |

**Equation 1)**

$$2'-\text{FL}_{1+3} = 2.180 \text{ g/L}$$

$$2'-\text{FL}_{2+4} = 0.026 \text{ g/L}$$

$$2'-\text{FL}_{\text{pooled}} = (2.170 \cdot 0.8) \text{ g/L} + (0.026 \cdot 0.2) \text{ g/L}$$

$$2'-\text{FL}_{\text{pooled}} = 1.7412 \text{ g/L}$$

2. When Lewis milk group was specifically given, values were multiplied by 0.7 for milk group 1 (70% of the population), 0.2 for milk group 2 (20% of the population), 0.09 for milk group 3 (9% of the population), 0.01 for milk group 4 (1% of the population). This calculation was followed for all analyzed HMOs.

| Paper                               | Sample | Country     | Lactation phase | Milk group | Milk type    | 3 FL  |
|-------------------------------------|--------|-------------|-----------------|------------|--------------|-------|
| <i>Austin et al. Nutrients 2019</i> | 28     | Switzerland | 0-5 days        | 1          | Secretor     | 0,212 |
| <i>Austin et al. Nutrients 2019</i> | 28     | Switzerland | 0-5 days        | 2          | Non-secretor | 0,995 |
| <i>Austin et al. Nutrients 2019</i> | 28     | Switzerland | 0-5 days        | 3          | Secretor     | 0,039 |
| <i>Austin et al. Nutrients 2019</i> | 28     | Switzerland | 0-5 days        | 4          | Non-secretor | 0,224 |

#### Equation 2)

$$3\text{FL}_1 = 0.212 \text{ g/L}$$

$$3\text{FL}_2 = 0.995 \text{ g/L}$$

$$3FL_3 = 0.039 \text{ g/L}$$

$$3FL_4 = 0.224 \text{ g/L}$$

$$3FL_{pooled} = (0.212 \cdot 0.7) \text{ g/L} + (0.995 \cdot 0.19) \text{ g/L} + (0.039 \cdot 0.1) \text{ g/L} + (0.224 \cdot 0.01) \text{ g/L}$$

$$3FL_{pooled} = 0.344 \text{ g/L} \quad (2)$$

Numbers in red are the result of pooling calculations. This method of pooling was followed for the 15 papers where trial subjects were divided according to their milk groups.
