# Supplementary material for: The Mean of Milk: A Review of Human Milk Oligosaccharide Concentrations throughout Lactation
Source: Nutrients. 2021 Aug 9;13(8):2737. doi: 10.3390/nu13082737 (PMC8398195; doi:10.3390/nu13082737)
Supplement: Supplementary file 1 [file nutrients-13-02737-s001.zip › nutrients-1280527 supplementary Table S2.xlsx]

## Sheet: Colostrum
	2'-FL	LNFP-I	LNDFH-I (DF-LNT)	LNT	6'-SL	LST c	LDFT (DFL)	LNFP-III	LNnT	F-LNH-I (MFLNH I)	F-LNH-II	DSLNT	3-FL	LNFP-II	TF-LNH	DS-LNH	F-LNH-III	3'-SL	DF-LNH I (a)	LST b	LST a	SLNH	FS-LNH	FSL (3'S-3'FL)	LNFP-VI	LNDFH-II	DF-LNH III (c)	LNFP-V	LNH	FDS-LNH	LNnH	6'SLN	DSL	pLNnH	pLNH	F-para-LNH I	DF-pLNH	DF-pLNnH
Total number of values	1101	1165	885	916	3319	962	320	622	877	226	39	796	833	1027	96	205	318	3391	756	887	396	11	11	116	1	452	41	709	439	205	203	26	26	18
Number of excluded values	0	0	0	0	0	0	0	0	0	0	0	0	0	0	0	0	0	0	0	0	0	0	0	0	0	0	0	0	0	0	0	0	0	0
Number of binned values	1101	1165	885	916	3319	962	320	622	877	226	39	796	833	1027	96	205	318	3391	756	887	396	11	11	116	1	452	41	709	439	205	203	26	26	18
Minimum	0.552	0.784	0.533	0.26025	0.276	0.174	0.16	0.052	0.211	0.012	0.07	0.3	0.05	0.042	0.09	0.2	0.201	0.082	0	0.03	0.008	0.096	0.086	0	0.0715	0.00075	0.064	0.001	0.01	0.04	0.01	0.022	0.005	0
Median	3.6	1.9	0.818	0.9	0.72	0.6	0.607	0.445	0.533	0.6	0.07	0.405	0.344	0.42	0.264	0.2	0.201	0.16	0.138	0.079	0.142	0.096	0.086	0.079	0.0715	0.066	0.064	0.032	0.06	0.04	0.01	0.022	0.005	0
Maximum	5.04	3	2.1	2.39	0.938	1.4	1.02	0.98	0.66	0.6	0.848	1.4	0.687	0.98	0.413	0.23	0.221	0.59	0.632	1.05	0.17	0.096	0.086	0.18	0.0715	0.19	0.064	0.25	0.117	0.07	0.18	0.022	0.005	0
Mean	3.1811	1.65341	1.03832	0.90883	0.658577	0.612526	0.598969	0.517094	0.455303	0.439257	0.429077	0.412543	0.37039	0.345531	0.2545	0.20761	0.202761	0.193866	0.153653	0.146944	0.107088	0.096	0.086	0.0843621	0.0715	0.0703402	0.064	0.0630363	0.0605991	0.0476098	0.0338867	0.022	0.005	0
Std. Deviation	0.922056	0.55128	0.266402	0.351358	0.107903	0.214145	0.106601	0.275614	0.135986	0.234241	0.392918	0.171525	0.111625	0.165111	0.102385	0.0130851	0.00567629	0.068368	0.0796047	0.166591	0.053035	0	0	0.0612756	0	0.0509832	0	0.0487317	0.041372	0.0130851	0.0476586	0	0	0
Std. Error of Mean	0.0277884	0.0161514	0.00895501	0.0116092	0.00187296	0.00690431	0.0059592	0.0110511	0.00459191	0.0155815	0.0629172	0.00607955	0.00386758	0.00515218	0.0104496	0.000913902	0.000318311	0.00117406	0.0028952	0.00559356	0.00266511	0	0	0.0056893	0	0.00239805	0	0.00183016	0.00197458	0.000913902	0.00334498	0	0	0
Lower 95% CI of mean	3.12658	1.62172	1.02075	0.886046	0.654905	0.598977	0.587244	0.495392	0.446291	0.408552	0.301708	0.400609	0.362799	0.335421	0.233755	0.205808	0.202135	0.191564	0.14797	0.135965	0.101849	0.096	0.086	0.0730927		0.0656274	0.064	0.0594431	0.0567183	0.0458079	0.0272912	0.022	0.005	0
Upper 95% CI of mean	3.23563	1.6851	1.0559	0.931614	0.66225	0.626075	0.610693	0.538796	0.464316	0.469961	0.556446	0.424477	0.377982	0.355641	0.275245	0.209412	0.203387	0.196168	0.159337	0.157922	0.112328	0.096	0.086	0.0956315		0.0750529	0.064	0.0666295	0.0644799	0.0494117	0.0404822	0.022	0.005	0
References
Aakko, J., et al. “Human Milk Oligosaccharide Categories Define the Microbiota Composition in Human Colostrum.” Beneficial Microbes, vol. 8, no. 4, 2017, pp. 563–67, doi:10.3920/BM2016.0185.
Asakuma, S., et al. “Variation of Major Neutral Oligosaccharides Levels in Human Colostrum.” European Journal of Clinical Nutrition, vol. 62, no. 4, 2008, pp. 488–94, doi:10.1038/sj.ejcn.1602738.
Asakuma, Sadaki, et al. “Sialyl Oligosaccharides of Human Colostrum: Changes in Concentration during the First Three Days of Lactation.” Bioscience, Biotechnology, and Biochemistry, vol. 71, no. 6, 2007, pp. 1447–51, doi:10.1271/bbb.60529.
Austin, et al. “Human Milk Oligosaccharides in the Milk of Mothers Delivering Term versus Preterm Infants.” Nutrients, vol. 11, no. 6, 2019, p. 1282, doi:10.3390/nu11061282.
Bao, Yuanwu, et al. “Quantification of Neutral Human Milk Oligosaccharides by Graphitic Carbon High-Performance Liquid Chromatography with Tandem Mass Spectrometry.” Analytical Biochemistry, vol. 433, no. 1, Elsevier Inc., 2013, pp. 28–35, doi:10.1016/j.ab.2012.10.003.
Coppa, G. V, et al. “Oligosaccharides in Human Milk during Different Phases of Lactation.” Acta Paediatrica (Oslo, Norway : 1992). Supplement, vol. 88, no. 430, 1999, pp. 89–94, http://www.ncbi.nlm.nih.gov/pubmed/10569230.
Csernák, Orsolya, et al. “Quantitative Analysis of 3’- and 6’-Sialyllactose in Human Milk Samples by HPLC-MS/MS: A Validated Method for the Comparison of Two Consecutive Lactation Periods in the Same Woman.” Journal of Pharmaceutical and Biomedical Analysis, vol. 184, 2020, doi:10.1016/j.jpba.2020.113184.
Erney, Renee M., et al. “Variability of Human Milk Neutral Oligosaccharides in a Diverse Population.” Journal of Pediatric Gastroenterology and Nutrition, vol. 30, no. 2, J Pediatr Gastroenterol Nutr, Feb. 2000, pp. 181–92, doi:10.1097/00005176-200002000-00016.
Ferreira, Ana Lorena, et al. “Human Milk Oligosaccharide Profile Variation Brazilian Cohort.” Nutrients, vol. 12, no. 3, 2020, p. 790.
Huang, Xunwen, et al. “Improved Simple Sample Pretreatment Method for Quantitation of Major Human Milk Oligosaccharides Using Ultrahigh Pressure Liquid Chromatography with Fluorescence Detection.” Journal of Agricultural and Food Chemistry, vol. 67, no. 44, American Chemical Society, 2019, pp. 12237–44, doi:10.1021/acs.jafc.9b03445.
Kunz, C., et al. “Oligosaccharides in Milk: Structural, Functional, and Metabolic Aspects.” Annual Review of Nutrition, no. 20, 2000, pp. 699–722.
Kunz, Clemens, et al. “Influence of Gestational Age, Secretor, and Lewis Blood Group Status on the Oligosaccharide Content of Human Milk.” Journal of Pediatric Gastroenterology and Nutrition, vol. 64, no. 5, 2017, pp. 789–98, doi:10.1097/MPG.0000000000001402.
Ma, Lin, et al. “Lactational Changes in the Human Milk Oligosaccharide Concentration in Chinese and Malaysian Mothers’ Milk.” International Dairy Journal, vol. 87, Elsevier Ltd, 2018, pp. 1–10, doi:10.1016/j.idairyj.2018.07.015.
Martín-Sosa, S., et al. “Sialyloligosaccharides in Human and Bovine Milk and in Infant Formulas: Variations with the Progression of Lactation.” Journal of Dairy Science, vol. 86, no. 1, 2003, pp. 52–59, doi:10.3168/jds.S0022-0302(03)73583-8.
Moubareck, Carole Ayoub, et al. “Profiles of Human Milk Oligosaccharides and Their Relations to the Milk Microbiota of Breastfeeding Mothers in Dubai.” Nutrients, vol. 12, no. 6, 2020, pp. 1–15, doi:10.3390/nu12061727.
Musumeci, Maria, et al. “Oligosaccharides in Colostrum of Italian and Burkinabe Women.” JPGN, vol. 1, no. September, 2006, pp. 1–15, papers3://publication/uuid/BB8C5270-F7DC-43A9-B3F9-B2E275602579.
Nakano, Taku, et al. “Sialic Acid in Human Milk : Composition and Functions.” Acta Pædiatrica, vol. 42, no. 1, 2001, pp. 11–17.
Nijman, Rose M., et al. “Characterization and Quantification of Oligosaccharides in Human Milk and Infant Formula.” Journal of Agricultural and Food Chemistry, vol. 66, no. 26, American Chemical Society, 2018, pp. 6851–59, doi:10.1021/acs.jafc.8b01515.
Samuel, Tinu Mary, et al. “Impact of Maternal Characteristics on Human Milk Oligosaccharide Composition over the First 4 Months of Lactation in a Cohort of Healthy European Mothers.” Scientific Reports, vol. 9, no. 1, 2019, pp. 1–10, doi:10.1038/s41598-019-48337-4.
Sjögren, Ylva Margareta, et al. “Neutral Oligosaccharides in Colostrum in Relation to Maternal Allergy and Allergy Development in Children up to 18 Months of Age.” Pediatric Allergy and Immunology, vol. 18, no. 1, 2007, pp. 20–26, doi:10.1111/j.1399-3038.2006.00486.x.
Spevacek, Ann R., et al. “Infant Maturity at Birth Reveals Minor Differences in the Maternal Milk Metabolome in the First Month of Lactation.” The Journal of Nutrition, vol. 145, no. 8, 2015, pp. 1698–708, doi:10.3945/jn.115.210252.
Sumiyoshi, Wataru, et al. “Determination of Each Neutral Oligosaccharide in the Milk of Japanese Women during the Course of Lactation.” British Journal of Nutrition, vol. 89, no. 01, 2003, p. 61, doi:10.1079/bjn2002746.
Thurl, Stephan, et al. “Variation of Human Milk Oligosaccharides in Relation to Milk Groups and Lactational Periods.” British Journal of Nutrition, vol. 104, no. 9, 2010, pp. 1261–71, doi:10.1017/S0007114510002072.
Tonon, Karina M., et al. “Validation and Application of a Method for the Simultaneous Absolute Quantification of 16 Neutral and Acidic Human Milk Oligosaccharides by Graphitized Carbon Liquid Chromatography – Electrospray Ionization – Mass Spectrometry.” Food Chemistry, vol. 274, no. September 2018, Elsevier, 2019, pp. 691–97, doi:10.1016/j.foodchem.2018.09.036.
Torres Roldan, Victor D., et al. “Human Milk Oligosaccharides and Their Association with Late-Onset Neonatal Sepsis in Peruvian Very-Low-Birth-Weight Infants.” American Journal of Clinical Nutrition, vol. 112, no. 1, Oxford University Press, 2020, pp. 106–12, doi:10.1093/ajcn/nqaa102.
Wang, Yanfei, et al. “Comparative Major Oligosaccharides and Lactose between Chinese Human and Animal Milk.” International Dairy Journal, vol. 108, Elsevier Ltd, Sept. 2020, doi:10.1016/j.idairyj.2020.104727.
Wu, Kou Jen, et al. “Human Milk Oligosaccharide 2′-Fucosyllactose Reduces Neurodegeneration in Stroke Brain.” Translational Stroke Research, vol. 11, no. 5, Translational Stroke Research, 2020, pp. 1001–11, doi:10.1007/s12975-019-00774-z.

## Sheet: Transitional_x0009_
		2'-FL	LNFP-I	LNT	6'-SL	DSLNT	DF-LNH I (a)	3-FL	LDFT (DFL)	LST c	LNnT	F-LNH-II	F-LNH-III	LNFP-III	LNDFH-I (DF-LNT)	LNFP-II	LST b	TF-LNH	LNDFH-II	3'-SL	LNH	LST a	FSL (3'S-3'FL)	LNFP-V	LNnH	LNFP-VI	DSL	6'SLN	pLNnH	pLNH	F-LNH-I (MFLNH I)	F-para-LNH I	DF-LNH III (c)	DF-pLNH	DF-pLNnH
Total number of values		789	798	645	5488	75	18	693	62	194	230	18	20	113	209	297	116	39	179	5488	148	129	59	677	178	446	40	60	18
Number of excluded values		0	0	0	0	0	0	0	0	0	0	0	0	0	0	0	0	0	0	0	0	0	0	0	0	0	0	0	0
Number of binned values		789	798	645	5488	75	18	693	62	194	230	18	20	113	209	297	116	39	179	5488	148	129	59	677	178	446	40	60	18
Minimum		0.104	0.369	0.36	0	0.001	0.632	0.104	0.4	0.001	0.149	0.464	0.243	0.072	0	0	0	0.11	0.024	0	0.046	0	0.006	0.001	0.005	0.022	0.02	0.006	0
Median		2.6	1.1	0.88	0.73	0.644	0.632	0.51	0.68	0.488	0.41	0.464	0.352	0.4	0.18	0.29	0.104	0.228	0.024	0.13	0.116	0.078	0.12	0.057	0.01	0.022	0.02	0.015	0
Maximum		2.88	1.932	3.9	1.297	1.3	0.632	1.67	0.7	0.941	1.033	0.464	0.682	0.74	0.988	1.452	0.47	0.228	0.96	0.25	0.164	0.18	0.146	0.35	0.172	0.022	0.02	0.015	0
Mean		2.06503	1.10692	1.07053	0.714219	0.674107	0.632	0.590769	0.556774	0.5515	0.474965	0.464	0.4363	0.37308	0.366718	0.325572	0.204009	0.173538	0.166134	0.129823	0.110068	0.090876	0.0906102	0.066938	0.0461348	0.022	0.02	0.012	0
Std. Deviation		0.925263	0.328096	0.612464	0.127325	0.314905	0	0.284638	0.142332	0.210886	0.254008	0	0.167835	0.184962	0.27489	0.237928	0.147872	0.0595942	0.293362	0.0123701	0.0248209	0.0457039	0.0620281	0.070131	0.0572615	0	0	0.00427844	0
Std. Error of Mean		0.0329403	0.0116145	0.0241157	0.00171873	0.036362	0	0.0108125	0.0180761	0.0151407	0.0167488	0	0.0375289	0.0173998	0.0190145	0.013806	0.0137296	0.00954271	0.0219269	0.000166981	0.00204027	0.004024	0.00807537	0.00269535	0.00429193	0	0	0.000552345	0
Lower 95% CI of mean		2.00037	1.08413	1.02317	0.71085	0.601654	0.632	0.56954	0.520629	0.521637	0.441964	0.464	0.357751	0.338604	0.329232	0.298402	0.176813	0.15422	0.122864	0.129496	0.106036	0.0829138	0.0744456	0.0616457	0.0376649	0.022	0.02	0.0108948	0
Upper 95% CI of mean		2.12969	1.12972	1.11788	0.717589	0.74656	0.632	0.611998	0.59292	0.581363	0.507967	0.464	0.514849	0.407555	0.404204	0.352743	0.231204	0.192857	0.209404	0.13015	0.1141	0.0988381	0.106775	0.0722302	0.0546048	0.022	0.02	0.0131052	0
References
Austin, Sean, et al. “Temporal Change of the Content of 10 Oligosaccharides in the Milk of Chinese Urban Mothers.” Nutrients, vol. 8, no. 6, 2016, doi:10.3390/nu8060346.
Coppa, G. V, et al. “Oligosaccharides in Human Milk during Different Phases of Lactation.” Acta Paediatrica (Oslo, Norway : 1992). Supplement, vol. 88, no. 430, 1999, pp. 89–94, http://www.ncbi.nlm.nih.gov/pubmed/10569230.
Csernák, Orsolya, et al. “Quantitative Analysis of 3’- and 6’-Sialyllactose in Human Milk Samples by HPLC-MS/MS: A Validated Method for the Comparison of Two Consecutive Lactation Periods in the Same Woman.” Journal of Pharmaceutical and Biomedical Analysis, vol. 184, 2020, doi:10.1016/j.jpba.2020.113184.
Erney, Renee M., et al. “Variability of Human Milk Neutral Oligosaccharides in a Diverse Population.” Journal of Pediatric Gastroenterology and Nutrition, vol. 30, no. 2, J Pediatr Gastroenterol Nutr, Feb. 2000, pp. 181–92, doi:10.1097/00005176-200002000-00016.
Huang, Xunwen, et al. “Improved Simple Sample Pretreatment Method for Quantitation of Major Human Milk Oligosaccharides Using Ultrahigh Pressure Liquid Chromatography with Fluorescence Detection.” Journal of Agricultural and Food Chemistry, vol. 67, no. 44, American Chemical Society, 2019, pp. 12237–44, doi:10.1021/acs.jafc.9b03445.
Kunz, C., et al. “Oligosaccharides in Milk: Structural, Functional, and Metabolic Aspects.” Annual Review of Nutrition, no. 20, 2000, pp. 699–722.
Kunz, Clemens, et al. “Influence of Gestational Age, Secretor, and Lewis Blood Group Status on the Oligosaccharide Content of Human Milk.” Journal of Pediatric Gastroenterology and Nutrition, vol. 64, no. 5, 2017, pp. 789–98, doi:10.1097/MPG.0000000000001402.
Leo, Fiame, et al. “Determination of Sialyl and Neutral Oligosaccharide Levels in Transition and Mature Milks of Samoan Women, Using Anthranilic Derivatization Followed by Reverse Phase High Performance Liquid Chromatography.” Bioscience, Biotechnology, and Biochemistry, vol. 74, no. 2, 2010, pp. 298–303, doi:10.1271/bbb.90614.
Leo, Fiame, et al. “Improved Determination of Milk Oligosaccharides Using a Single Derivatization with Anthranilic Acid and Separation by Reversed-Phase High-Performance Liquid Chromatography.” Journal of Chromatography A, vol. 1216, no. 9, 2009, pp. 1520–23, doi:10.1016/j.chroma.2009.01.015.
Ma, Lin, et al. “Lactational Changes in the Human Milk Oligosaccharide Concentration in Chinese and Malaysian Mothers’ Milk.” International Dairy Journal, vol. 87, Elsevier Ltd, 2018, pp. 1–10, doi:10.1016/j.idairyj.2018.07.015.
Martín-Sosa, S., et al. “Sialyloligosaccharides in Human and Bovine Milk and in Infant Formulas: Variations with the Progression of Lactation.” Journal of Dairy Science, vol. 86, no. 1, 2003, pp. 52–59, doi:10.3168/jds.S0022-0302(03)73583-8.
McJarrow, Paul, et al. “Human Milk Oligosaccharide, Phospholipid, and Ganglioside Concentrations in Breast Milk from United Arab Emirates Mothers: Results from the MISC Cohort.” Nutrients, vol. 11, no. 10, 2019, doi:10.3390/nu11102400.
Moubareck, Carole Ayoub, et al. “Profiles of Human Milk Oligosaccharides and Their Relations to the Milk Microbiota of Breastfeeding Mothers in Dubai.” Nutrients, vol. 12, no. 6, 2020, pp. 1–15, doi:10.3390/nu12061727.
Nakano, Taku, et al. “Sialic Acid in Human Milk : Composition and Functions.” Acta Pædiatrica, vol. 42, no. 1, 2001, pp. 11–17.
Sakaguchi, Yohei, et al. “Liquid Chromatography/Tandem Mass Spectrometry with Fluorous Derivatization Method for Selective Analysis of Sialyl Oligosaccharides.” Rapid Communications in Mass Spectrometry, vol. 28, no. 23, 2014, pp. 2481–89, doi:10.1002/rcm.7042.
Samuel, Tinu Mary, et al. “Impact of Maternal Characteristics on Human Milk Oligosaccharide Composition over the First 4 Months of Lactation in a Cohort of Healthy European Mothers.” Scientific Reports, vol. 9, no. 1, 2019, pp. 1–10, doi:10.1038/s41598-019-48337-4.
Spevacek, Ann R., et al. “Infant Maturity at Birth Reveals Minor Differences in the Maternal Milk Metabolome in the First Month of Lactation.” The Journal of Nutrition, vol. 145, no. 8, 2015, pp. 1698–708, doi:10.3945/jn.115.210252.
Sumiyoshi, Wataru, et al. “Determination of Each Neutral Oligosaccharide in the Milk of Japanese Women during the Course of Lactation.” British Journal of Nutrition, vol. 89, no. 01, 2003, p. 61, doi:10.1079/bjn2002746.
Wang, Yanfei, et al. “Comparative Major Oligosaccharides and Lactose between Chinese Human and Animal Milk.” International Dairy Journal, vol. 108, Elsevier Ltd, Sept. 2020, doi:10.1016/j.idairyj.2020.104727.
Xu, Gege, et al. “Absolute Quantitation of Human Milk Oligosaccharides Reveals Phenotypic Variations during Lactation.” The Journal of Nutrition, vol. 147, no. 1, 2017, pp. 117–24, doi:10.3945/jn.116.238279.

## Sheet: Mature
	2'-FL	LNDFH-I (DF-LNT)	LNFP-I	LNFP-II	LNT	3-FL	6'-SL	DSLNT	LNnT	LDFT (DFL)	FDS-LNH	LNFP-III	3'-SL	LST c	TF-LNH	DS-LNH	F-LNH-III	F-LNH-II	DF-LNH I (a)	LST b	LNFP-V	LNDFH-II	LNH	S-LNFP II	F-LNH-III	F-LNH-I (MFLNH I)	DF-LNH II (b)	F-para-LNH I	DF-LNH III (c)	LNnH	DF-pLNnH	LST a	LNFP-VI	FSL (3'S-3'FL)	pLNH	6'SLN	pLNnH	DF-pLNH	S-LNFP I	S-LNH	S-LNnH I	S-LNnH II	FS-LNH
Total number of values	4048	2766	4156	3220	3841	3747	5691	1261	4048	3035	668	2650	6014	1549	345	1470	99	219	2111	1589	2245	629	1167	87	98	1481	20	20	98	385	78	568	892	206	24	46	77
Number of excluded values	0	0	0	0	0	0	0	0	0	0	0	0	0	0	0	0	0	0	0	0	0	0	0	0	0	0	0	0	0	0	0	0	0	0	0	0	0
Number of binned values	4048	2766	4156	3220	3841	3747	5691	1261	4048	3035	668	2650	6014	1549	345	1470	99	219	2111	1589	2245	629	1167	87	98	1481	20	20	98	385	78	568	892	206	24	46	77
Minimum	0.69	0.005	0.161	0.022	0.2	0.16	0	0	0.065	0.04	0.08	0.021	0	0	0.035	0.055	0.109	0.007	0	0	0.002	0.016	0.006	0.013	0.008	0	0.051	0.049	0.008	0.01	0.041	0	0.017	0	0.009	0.005	0
Median	2.3	1.074	0.93	0.539	0.62	0.73	0.448	0.3	0.31	0.316	0.285	0.199	0.14	0.159	0.177	0.104	0.11	0.009	0.119	0.08	0.049	0.05	0.093	0.079	0.056	0.06	0.051	0.049	0.056	0.036	0.041	0.05	0.017	0.006	0.009	0.006	0
Maximum	4.28	2.53	2.14	1.814	1.6	1.9	0.736	1.122	1.24	0.54	0.666	0.89	0.7	0.3	0.394	0.23	0.128	0.34	0.389	0.256	0.28	0.235	0.16	0.079	0.056	0.14	0.051	0.049	0.056	0.17	0.041	0.072	0.017	0.119	0.009	0.006	0.02
Mean	2.27945	1.10226	0.833797	0.788635	0.738802	0.724597	0.402824	0.376533	0.372003	0.29267	0.282545	0.256912	0.192352	0.170053	0.150217	0.136176	0.115798	0.118808	0.111975	0.10052	0.0780976	0.0770556	0.0756264	0.0608391	0.056	0.0545982	0.051	0.049	0.0462041	0.0453506	0.041	0.0374243	0.017	0.0120728	0.009	0.00556522	0.00519481
Std. Deviation	0.570904	0.45402	0.364948	0.48988	0.277256	0.483136	0.149681	0.203216	0.24343	0.119275	0.175648	0.23648	0.111103	0.0740696	0.0992949	0.0493596	0.00868024	0.139364	0.0751715	0.0536865	0.0598968	0.0563407	0.0389983	0.0257866	0.056	0.0304052	0	0	0.0194449	0.0370406	0	0.0219695	0	0.0166862	0	0.000501206	0.00882735
Std. Error of Mean	0.0089731	0.00863274	0.005661	0.008633	0.00448825	0.00789273	0.00198414	0.0057227	0.00382608	0.00216506	0.00679603	0.0045938	0.00143267	0.00188198	0.00534586	0.0012874	0.000872397	0.00941735	0.0016361	0.0013468	0.00126414	0.00224645	0.00114159	0.00276462		0.000790079	0	0	0.00196423	0.00188776	0	0.000921822	0	0.00116258	0	7.38988e-05	0.00100597
																									0.0462041
Lower 95% CI of mean	2.26186	1.08533	0.822698	0.771708	0,729	0.709123	0.398934	0.365306	0.364501	0.288424	0.269201	0.247905	0.189544	0.166361	0.139703	0.13365	0.114067	0.100248	0.108767	0.0978781	0.0756185	0.0726442	0.0733866	0.0553432	0.0194449	0.0530485	0.051	0.049	0.0423056	0.041639	0.041	0.0356137	0.017	0.00978067	0.009	0.00541638	0.00319124
Upper 95% CI of mean	2.29704	1.11919	0.844896	0.805562	0.747707	0.740072	0.406714	0.38776	0.379504	0.296915	0.295889	0.26592	0.195161	0.173744	0.160732	0.138701	0.117529	0.137369	0.115184	0.103162	0.0805766	0.0814671	0.0778662	0.066335	0.00196423	0.056148	0.051	0.049	0.0501025	0.0490623	0.041	0.0392349	0.017	0.014365	0.009	0.00571406	0.00719837
References
Asakuma, Sadaki, et al. “Physiology of Consumption of Human Milk Oligosaccharides by Infant Gut-Associated Bifidobacteria.” Journal of Biological Chemistry, vol. 286, no. 40, 2011, pp. 34583–92, doi:10.1074/jbc.M111.248138.
Austin, et al. “Human Milk Oligosaccharides in the Milk of Mothers Delivering Term versus Preterm Infants.” Nutrients, vol. 11, no. 6, 2019, p. 1282, doi:10.3390/nu11061282.
Austin, Sean, et al. “Temporal Change of the Content of 10 Oligosaccharides in the Milk of Chinese Urban Mothers.” Nutrients, vol. 8, no. 6, 2016, doi:10.3390/nu8060346.
Azad, Meghan B., et al. “Human Milk Oligosaccharide Concentrations Are Associated with Multiple Fixed and Modifiable Maternal Characteristics, Environmental Factors, and Feeding Practices.” Journal of Nutrition, vol. 148, no. 11, 2018, pp. 1733–42, doi:10.1093/jn/nxy175.
Bao, Yuanwu, et al. “Quantification of Neutral Human Milk Oligosaccharides by Graphitic Carbon High-Performance Liquid Chromatography with Tandem Mass Spectrometry.” Analytical Biochemistry, vol. 433, no. 1, Elsevier Inc., 2013, pp. 28–35, doi:10.1016/j.ab.2012.10.003.
Borewicz, Klaudyna, et al. “Correlating Infant Fecal Microbiota Composition and Human Milk Oligosaccharide Consumption by Microbiota of 1-Month-Old Breastfed Infants.” Molecular Nutrition and Food Research, vol. 1801214, 2019, pp. 1–13, doi:10.1002/mnfr.201801214.
Borewicz, Klaudyna, et al. “The Association between Breastmilk Oligosaccharides and Faecal Microbiota in Healthy Breastfed Infants at Two, Six, and Twelve Weeks of Age.” Scientific Reports, vol. 10, no. 1, Springer US, 2020, pp. 1–12, doi:10.1038/s41598-020-61024-z.
Chaturvedi, Prasoon, et al. “Fucosylated Human Milk Oligosaccharides Vary between Individuals and over the Course of Lactation.” Glycobiology, vol. 11, no. 5, 2001, pp. 365–72, doi:10.1093/glycob/11.5.365.
Chaturvedi, Prasoon, et al. “Milk Oligosaccharide Profiles by Reversed-Phase.” Analytical Biochemistry, vol. 97, no. 251, 1997, pp. 89–97.
Coppa, G. V, et al. “Oligosaccharides in Human Milk during Different Phases of Lactation.” Acta Paediatrica (Oslo, Norway : 1992). Supplement, vol. 88, no. 430, 1999, pp. 89–94, http://www.ncbi.nlm.nih.gov/pubmed/10569230.
Coppa, Giovanni V., et al. “Oligosaccharides in 4 Different Milk Groups, Bifidobacteria, and Ruminococcus Obeum.” Journal of Pediatric Gastroenterology and Nutrition, vol. 53, no. 1, 2011, pp. 80–87, doi:10.1097/MPG.0b013e3182073103.
Csernák, Orsolya, et al. “Quantitative Analysis of 3’- and 6’-Sialyllactose in Human Milk Samples by HPLC-MS/MS: A Validated Method for the Comparison of Two Consecutive Lactation Periods in the Same Woman.” Journal of Pharmaceutical and Biomedical Analysis, vol. 184, 2020, doi:10.1016/j.jpba.2020.113184.
Erney, Renee M., et al. “Variability of Human Milk Neutral Oligosaccharides in a Diverse Population.” Journal of Pediatric Gastroenterology and Nutrition, vol. 30, no. 2, J Pediatr Gastroenterol Nutr, Feb. 2000, pp. 181–92, doi:10.1097/00005176-200002000-00016.
Ferreira, Ana Lorena, et al. “Human Milk Oligosaccharide Profile Variation Brazilian Cohort.” Nutrients, vol. 12, no. 3, 2020, p. 790.
Galeotti, Fabio, et al. “Capillary Electrophoresis Separation of Human Milk Neutral and Acidic Oligosaccharides Derivatized with 2-Aminoacridone.” Electrophoresis, vol. 35, no. 6, 2014, pp. 811–18, doi:10.1002/elps.201300490.
Hong, Qiuting, et al. “Label-Free Absolute Quantitation of Oligosaccharides Using Multiple Reaction Monitoring.” Analytical Chemistry, vol. 86, no. 5, 2014, pp. 2640–47, doi:10.1021/ac404006z.
Huang, Xunwen, et al. “Improved Simple Sample Pretreatment Method for Quantitation of Major Human Milk Oligosaccharides Using Ultrahigh Pressure Liquid Chromatography with Fluorescence Detection.” Journal of Agricultural and Food Chemistry, vol. 67, no. 44, American Chemical Society, 2019, pp. 12237–44, doi:10.1021/acs.jafc.9b03445.
Kunz, Clemens, et al. “Influence of Gestational Age, Secretor, and Lewis Blood Group Status on the Oligosaccharide Content of Human Milk.” Journal of Pediatric Gastroenterology and Nutrition, vol. 64, no. 5, 2017, pp. 789–98, doi:10.1097/MPG.0000000000001402.
Lagström, Hanna, et al. “Associations between Human Milk Oligosaccharides and Growth in Infancy and Early Childhood.” American Journal of Clinical Nutrition, vol. 111, no. 4, Oxford University Press, 2020, pp. 769–78, doi:10.1093/ajcn/nqaa010.
Leo, Fiame, et al. “Determination of Sialyl and Neutral Oligosaccharide Levels in Transition and Mature Milks of Samoan Women, Using Anthranilic Derivatization Followed by Reverse Phase High Performance Liquid Chromatography.” Bioscience, Biotechnology, and Biochemistry, vol. 74, no. 2, 2010, pp. 298–303, doi:10.1271/bbb.90614.
Leo, Fiame, et al. “Improved Determination of Milk Oligosaccharides Using a Single Derivatization with Anthranilic Acid and Separation by Reversed-Phase High-Performance Liquid Chromatography.” Journal of Chromatography A, vol. 1216, no. 9, 2009, pp. 1520–23, doi:10.1016/j.chroma.2009.01.015.
Ma, Lin, et al. “Lactational Changes in the Human Milk Oligosaccharide Concentration in Chinese and Malaysian Mothers’ Milk.” International Dairy Journal, vol. 87, Elsevier Ltd, 2018, pp. 1–10, doi:10.1016/j.idairyj.2018.07.015.
Martín-Sosa, S., et al. “Sialyloligosaccharides in Human and Bovine Milk and in Infant Formulas: Variations with the Progression of Lactation.” Journal of Dairy Science, vol. 86, no. 1, 2003, pp. 52–59, doi:10.3168/jds.S0022-0302(03)73583-8.
McGuire, Michelle K., et al. “What’s Normal? Oligosaccharide Concentrations and Profiles in Milk Produced by Healthy Women Vary Geographically.” American Journal of Clinical Nutrition, vol. 105, no. 5, 2017, pp. 1086–100, doi:10.3945/ajcn.116.139980.
Morrow, Ardythe L., et al. “Human Milk Oligosaccharides Are Associated with Protection against Diarrhea in Breast-Fed Infants.” Journal of Pediatrics, vol. 145, no. 3, Sept. 2004, pp. 297–303, doi:10.1016/j.jpeds.2004.04.054.
Moubareck, Carole Ayoub, et al. “Profiles of Human Milk Oligosaccharides and Their Relations to the Milk Microbiota of Breastfeeding Mothers in Dubai.” Nutrients, vol. 12, no. 6, 2020, pp. 1–15, doi:10.3390/nu12061727.
Nakano, Taku, et al. “Sialic Acid in Human Milk : Composition and Functions.” Acta Pædiatrica, vol. 42, no. 1, 2001, pp. 11–17.
Nakhla, Tarek, et al. “Neutral Oligosaccharide Content of Preterm Human Milk.” British Journal of Nutrition, vol. 82, no. 5, 1999, pp. 361–67, doi:10.1017/S0007114599001609.
Nijman, Rose M., et al. “Characterization and Quantification of Oligosaccharides in Human Milk and Infant Formula.” Journal of Agricultural and Food Chemistry, vol. 66, no. 26, American Chemical Society, 2018, pp. 6851–59, doi:10.1021/acs.jafc.8b01515.
Olivares, Marta, et al. “Human Milk Composition Differs in Healthy Mothers and Mothers with Celiac Disease.” European Journal of Nutrition, vol. 54, no. 1, 2014, pp. 119–28, doi:10.1007/s00394-014-0692-1.
Paganini, Daniela, et al. “Maternal Human Milk Oligosaccharide Profile and Galacto-Oligosaccharides in Kenyan Infants.” Nutrients, vol. 11, no. 11, 2019, p. E2596.
Saben, Jessica L., et al. “Third-Trimester Glucose Homeostasis in Healthy Women Is Differentially Associated with Human Milk Oligosaccharide Composition at 2 Months Postpartum by Secretor Phenotype.” Nutrients, vol. 12, no. 8, 2020, pp. 1–15, doi:10.3390/nu12082209.
Sakaguchi, Yohei, et al. “Liquid Chromatography/Tandem Mass Spectrometry with Fluorous Derivatization Method for Selective Analysis of Sialyl Oligosaccharides.” Rapid Communications in Mass Spectrometry, vol. 28, no. 23, 2014, pp. 2481–89, doi:10.1002/rcm.7042.
Samuel, Tinu Mary, et al. “Impact of Maternal Characteristics on Human Milk Oligosaccharide Composition over the First 4 Months of Lactation in a Cohort of Healthy European Mothers.” Scientific Reports, vol. 9, no. 1, 2019, pp. 1–10, doi:10.1038/s41598-019-48337-4.
Smilowitz, Jennifer T., et al. “The Human Milk Metabolome Reveals Diverse Oligosaccharide Profiles.” The Journal of Nutrition, vol. 143, no. 11, 2013, pp. 1709–18, doi:10.3945/jn.113.178772.
Spevacek, Ann R., et al. “Infant Maturity at Birth Reveals Minor Differences in the Maternal Milk Metabolome in the First Month of Lactation.” The Journal of Nutrition, vol. 145, no. 8, 2015, pp. 1698–708, doi:10.3945/jn.115.210252.
Sprenger, Norbert, et al. “Longitudinal Change of Selected Human Milk Oligosaccharides and Association to Infants’ Growth, an Observatory, Single Center, Longitudinal Cohort Study.” PLoS ONE, vol. 12, no. 2, 2017, pp. 1–15, doi:10.1371/journal.pone.0171814.
Sumiyoshi, Wataru, et al. “Determination of Each Neutral Oligosaccharide in the Milk of Japanese Women during the Course of Lactation.” British Journal of Nutrition, vol. 89, no. 01, 2003, p. 61, doi:10.1079/bjn2002746.
Thurl, Stephan, et al. “Quantification of Individual Oligosaccharide Compounds from Human Milk Using High-PH Anion-Exchange Chromatography.” Analytical Biochemistry, vol. 235, no. 2, 1996, pp. 202–06, doi:10.1006/abio.1996.0113.
Thurl, Stephan, et al. “Variation of Human Milk Oligosaccharides in Relation to Milk Groups and Lactational Periods.” British Journal of Nutrition, vol. 104, no. 9, 2010, pp. 1261–71, doi:10.1017/S0007114510002072.
Tonon, Karina M., et al. “Maternal and Infant Factors Associated with Human Milk Oligosaccharides Concentrations According to Secretor and Lewis Phenotypes.” Nutrients, 2019, pp. 1–23, doi:10.3390/nu11061358.
Torres Roldan, Victor D., et al. “Human Milk Oligosaccharides and Their Association with Late-Onset Neonatal Sepsis in Peruvian Very-Low-Birth-Weight Infants.” American Journal of Clinical Nutrition, vol. 112, no. 1, Oxford University Press, 2020, pp. 106–12, doi:10.1093/ajcn/nqaa102.
Totten, Sarah M., et al. “Comprehensive Profiles of Human Milk Oligosaccharides Yield Highly Sensitive and Specific Markers for Determining Secretor Status in Lactating Mothers.” Journal of Proteome Research, 2012.
Wang, Yanfei, et al. “Comparative Major Oligosaccharides and Lactose between Chinese Human and Animal Milk.” International Dairy Journal, vol. 108, Elsevier Ltd, Sept. 2020, doi:10.1016/j.idairyj.2020.104727.
Wu, Kou Jen, et al. “Human Milk Oligosaccharide 2′-Fucosyllactose Reduces Neurodegeneration in Stroke Brain.” Translational Stroke Research, vol. 11, no. 5, Translational Stroke Research, 2020, pp. 1001–11, doi:10.1007/s12975-019-00774-z.
Xu, Gege, et al. “Absolute Quantitation of Human Milk Oligosaccharides Reveals Phenotypic Variations during Lactation.” The Journal of Nutrition, vol. 147, no. 1, 2017, pp. 117–24, doi:10.3945/jn.116.238279.
Zhang, Wenyuan, et al. “Absolute Quantification of Twelve Oligosaccharides in Human Milk Using a Targeted Mass Spectrometry-Based Approach.” Carbohydrate Polymers, Elsevier Ltd., 2019, doi:10.1016/j.carbpol.2019.04.092.

## Sheet: Late Milk
	2'-FL	3-FL	LNDFH-I (DF-LNT)	LNT	LNFP-I	6'-SL	LDFT (DFL)	LNFP-II	LNFP-III	DSLNT	TF-LNH	LNnT	LNDFH-II	3'-SL	FDS-LNH	DS-LNH	F-LNH-III	F-LNH-I (MFLNH I)	DF-LNH I (a)	LST b	LST c	LNH	LNFP-V	LST a	LNFP-VI	LNnH	FSL (3'S-3'FL)	6'SLN	pLNH	F-LNH-II	F-para-LNH I	DF-LNH II (b)	DF-LNH III (c)	DF-pLNH	DF-pLNnH	pLNnH	S-LNFP I	S-LNFP II	S-LNH	S-LNnH I	S-LNnH II	FS-LNH
Total number of values	1951	1885	1170	1616	1855	4913	1276	819	990	1014	33	1738	284	3751	71	473	458	473	986	1227	1301	613	1221	403	446	201	46	86
Number of excluded values	0	0	0	0	0	0	0	0	0	0	0	0	0	0	0	0	0	0	0	0	0	0	0	0	0	0	0	0
Number of binned values	1951	1885	1170	1616	1855	4913	1276	819	990	1014	33	1738	284	3751	71	473	458	473	986	1227	1301	613	1221	403	446	201	46	86
Minimum	0	0.255	0.004	0.1	0	0.011	0	0	0.05	0.129	0.203	0.044	0.03	0.083	0.04	0.1	0.003	0.09	0.07	0.03	0.001	0.004	0.006	0.004	0.017	0.005	0.01	0
Median	1.722	1.175	0.67	0.56	0.427	0.187	0.271	0.35	0.219	0.2	0.203	0.19	0.03	0.127	0.16	0.11	0.128	0.09	0.087	0.054	0.04	0.07	0.029	0.05	0.017	0.018	0.01	0
Maximum	4.27	2.57	1.39	1.37	0.968	1	0.58	0.61	0.77	0.31	0.203	0.61	0.497	0.3	0.16	0.11	0.181	0.11	0.13	0.155	0.25	0.08	0.19	0.05	0.017	0.03	0.01	0.005
Mean	1.64644	0.92285	0.871082	0.63638	0.489852	0.298524	0.274906	0.269201	0.234431	0.224817	0.203	0.190016	0.130306	0.129195	0.117746	0.109027	0.10214	0.091945	0.0823225	0.0818883	0.079	0.0581892	0.0502588	0.0334938	0.017	0.0156318	0.01	0.00232558
Std. Deviation	0.678054	0.514239	0.457393	0.333075	0.273475	0.314966	0.10662	0.174853	0.174727	0.0771476	0	0.122919	0.192124	0.0255821	0.0577234	0.00296614	0.0489977	0.00593228	0.013848	0.0376356	0.0830827	0.0238927	0.0390786	0.019585	0	0.00833929	0	0.00250854
Std. Error of Mean	0.015351	0.0118443	0.013372	0.00828555	0.00634959	0.00449355	0.00298478	0.00610987	0.0055532	0.00242272	0	0.00294844	0.0114005	0.000417698	0.00685051	0.000136383	0.00228951	0.000272766	0.000441011	0.00107443	0.00230341	0.000965016	0.00111836	0.000975601	0	0.000588208	0	0.000270502
Lower 95% CI of mean	1.61633	0.899621	0.844846	0.620128	0.477399	0.289715	0.26905	0.257209	0.223534	0.220062	0.203	0.184233	0.107866	0.128376	0.104084	0.108759	0.0976405	0.091409	0.0814571	0.0797804	0.0744812	0.0562941	0.0480647	0.0315759	0.017	0.014472	0.01	0.00178775
Upper 95% CI of mean	1.67655	0.946079	0.897318	0.652632	0.502305	0.307333	0.280762	0.281194	0.245329	0.229571	0.203	0.195799	0.152747	0.130014	0.131409	0.109295	0.106639	0.092481	0.0831879	0.0839963	0.0835188	0.0600844	0.0524529	0.0354117	0.017	0.0167917	0.01	0.00286341
References
Austin, Sean, et al. “Temporal Change of the Content of 10 Oligosaccharides in the Milk of Chinese Urban Mothers.” Nutrients, vol. 8, no. 6, 2016, doi:10.3390/nu8060346.
Azad, Meghan B., et al. “Human Milk Oligosaccharide Concentrations Are Associated with Multiple Fixed and Modifiable Maternal Characteristics, Environmental Factors, and Feeding Practices.” Journal of Nutrition, vol. 148, no. 11, 2018, pp. 1733–42, doi:10.1093/jn/nxy175.
Chaturvedi, Prasoon, et al. “Fucosylated Human Milk Oligosaccharides Vary between Individuals and over the Course of Lactation.” Glycobiology, vol. 11, no. 5, 2001, pp. 365–72, doi:10.1093/glycob/11.5.365.
Csernák, Orsolya, et al. “Quantitative Analysis of 3’- and 6’-Sialyllactose in Human Milk Samples by HPLC-MS/MS: A Validated Method for the Comparison of Two Consecutive Lactation Periods in the Same Woman.” Journal of Pharmaceutical and Biomedical Analysis, vol. 184, 2020, doi:10.1016/j.jpba.2020.113184.
Erney, Renee M., et al. “Variability of Human Milk Neutral Oligosaccharides in a Diverse Population.” Journal of Pediatric Gastroenterology and Nutrition, vol. 30, no. 2, J Pediatr Gastroenterol Nutr, Feb. 2000, pp. 181–92, doi:10.1097/00005176-200002000-00016.
Ferreira, Ana Lorena, et al. “Human Milk Oligosaccharide Profile Variation Brazilian Cohort.” Nutrients, vol. 12, no. 3, 2020, p. 790.
Kunz, Clemens, et al. “Influence of Gestational Age, Secretor, and Lewis Blood Group Status on the Oligosaccharide Content of Human Milk.” Journal of Pediatric Gastroenterology and Nutrition, vol. 64, no. 5, 2017, pp. 789–98, doi:10.1097/MPG.0000000000001402.
Lagström, Hanna, et al. “Associations between Human Milk Oligosaccharides and Growth in Infancy and Early Childhood.” American Journal of Clinical Nutrition, vol. 111, no. 4, Oxford University Press, 2020, pp. 769–78, doi:10.1093/ajcn/nqaa010.
Lefebvre, Gregory, et al. “Time of Lactation and Maternal Fucosyltransferase Genetic Polymorphisms Determine the Variability in Human Milk Oligosaccharides.” Frontiers in Nutrition, vol. 7, 2020, doi:10.3389/fnut.2020.574459.
Leo, Fiame, et al. “Determination of Sialyl and Neutral Oligosaccharide Levels in Transition and Mature Milks of Samoan Women, Using Anthranilic Derivatization Followed by Reverse Phase High Performance Liquid Chromatography.” Bioscience, Biotechnology, and Biochemistry, vol. 74, no. 2, 2010, pp. 298–303, doi:10.1271/bbb.90614.
M.L.A., De Leoz, et al. “Lacto-N-Tetraose, Fucosylation, and Secretor Status Are Highly Variable in Human Milk Oligosaccharides from Women Delivering Preterm.” Journal of Proteome Research, vol. 11, no. 9, 2012, pp. 4662–72, http://ovidsp.ovid.com/ovidweb.cgi?T=JS&PAGE=reference&D=emed14&NEWS=N&AN=365618991.
Ma, Lin, et al. “Lactational Changes in the Human Milk Oligosaccharide Concentration in Chinese and Malaysian Mothers’ Milk.” International Dairy Journal, vol. 87, Elsevier Ltd, 2018, pp. 1–10, doi:10.1016/j.idairyj.2018.07.015.
McJarrow, Paul, et al. “Human Milk Oligosaccharide, Phospholipid, and Ganglioside Concentrations in Breast Milk from United Arab Emirates Mothers: Results from the MISC Cohort.” Nutrients, vol. 11, no. 10, 2019, doi:10.3390/nu11102400.
Moubareck, Carole Ayoub, et al. “Profiles of Human Milk Oligosaccharides and Their Relations to the Milk Microbiota of Breastfeeding Mothers in Dubai.” Nutrients, vol. 12, no. 6, 2020, pp. 1–15, doi:10.3390/nu12061727.
Nakano, Taku, et al. “Sialic Acid in Human Milk : Composition and Functions.” Acta Pædiatrica, vol. 42, no. 1, 2001, pp. 11–17.
Paganini, Daniela, et al. “Maternal Human Milk Oligosaccharide Profile and Galacto-Oligosaccharides in Kenyan Infants.” Nutrients, vol. 11, no. 11, 2019, p. E2596.
Samuel, Tinu Mary, et al. “Impact of Maternal Characteristics on Human Milk Oligosaccharide Composition over the First 4 Months of Lactation in a Cohort of Healthy European Mothers.” Scientific Reports, vol. 9, no. 1, 2019, pp. 1–10, doi:10.1038/s41598-019-48337-4.
Sprenger, Norbert, et al. “Longitudinal Change of Selected Human Milk Oligosaccharides and Association to Infants’ Growth, an Observatory, Single Center, Longitudinal Cohort Study.” PLoS ONE, vol. 12, no. 2, 2017, pp. 1–15, doi:10.1371/journal.pone.0171814.
Sumiyoshi, Wataru, et al. “Determination of Each Neutral Oligosaccharide in the Milk of Japanese Women during the Course of Lactation.” British Journal of Nutrition, vol. 89, no. 01, 2003, p. 61, doi:10.1079/bjn2002746.
Thurl, Stephan, et al. “Quantification of Individual Oligosaccharide Compounds from Human Milk Using High-PH Anion-Exchange Chromatography.” Analytical Biochemistry, vol. 235, no. 2, 1996, pp. 202–06, doi:10.1006/abio.1996.0113.
Williams, Janet E., et al. “Relationships Among Microbial Communities, Maternal Cells, Oligosaccharides, and Macronutrients in Human Milk _ Enhanced Reader.Pdf.” Journal of Human Lactation, vol. 33, no. 3, 2017, pp. 540–51, doi:10.1177/0890334417709433.
Wu, Kou Jen, et al. “Human Milk Oligosaccharide 2′-Fucosyllactose Reduces Neurodegeneration in Stroke Brain.” Translational Stroke Research, vol. 11, no. 5, Translational Stroke Research, 2020, pp. 1001–11, doi:10.1007/s12975-019-00774-z.
Xu, Gege, et al. “Absolute Quantitation of Human Milk Oligosaccharides Reveals Phenotypic Variations during Lactation.” The Journal of Nutrition, vol. 147, no. 1, 2017, pp. 117–24, doi:10.3945/jn.116.238279.
Zhang, Wenyuan, et al. “Absolute Quantification of Twelve Oligosaccharides in Human Milk Using a Targeted Mass Spectrometry-Based Approach.” Carbohydrate Polymers, Elsevier Ltd., 2019, doi:10.1016/j.carbpol.2019.04.092.

## Sheet: Total HMOs 
	0-5 days	6-14 days	15-90 days
Total number of values	129	198	1462
Minimum	9.15	6.2	8.6
25% Percentile	16.7	6.2	9.932
Median	16.7	16	10.2875
75% Percentile	21	19.6	12.1625
Maximum	25	20	16.79
Mean	17.7124	13.3343	11.2967
Std. Deviation	3.36888	6.53814	2.21275
Std. Error of Mean	0.296613	0.464645	0.0578706
Lower 95% CI of mean	17.1255	12.418	11.1832
Upper 95% CI of mean	18.2993	14.2507	11.4103
References
Albrecht, S., et al. “Gastrointestinal Metabolization of Human Milk Oligosaccharides.” Handbook of Dietary and Nutritional Aspects of Human Breast Milk, no. 5, 2013, pp. 293–314, doi:10.3920/978-90-8686-764-6_15.
Bode, L. “Human Milk Oligosaccharides and Their Beneficial Effects.” Handbook of Dietary and Nutritional Aspects of Human Breast Milk, no. 5, pp. 515–32, doi:10.3920/978-90-8686-764-6.
Coppa, Giorgi. “Total HMO and Free Glc, Gal, Fuc in Human Milk.” Carbohydrates in Human Milk, American Academy of Pediatrics, 1993, pp. 637–41.
Coppa, Giovanni V., et al. “Oligosaccharides in 4 Different Milk Groups, Bifidobacteria, and Ruminococcus Obeum.” Journal of Pediatric Gastroenterology and Nutrition, vol. 53, no. 1, 2011, pp. 80–87, doi:10.1097/MPG.0b013e3182073103.
Ferreira, Ana Lorena, et al. “Human Milk Oligosaccharide Profile Variation Brazilian Cohort.” Nutrients, vol. 12, no. 3, 2020, p. 790.
McGuire, Michelle K., et al. “What’s Normal? Oligosaccharide Concentrations and Profiles in Milk Produced by Healthy Women Vary Geographically.” American Journal of Clinical Nutrition, vol. 105, no. 5, 2017, pp. 1086–100, doi:10.3945/ajcn.116.139980.
Montreuil, Jean, and Suzanne Mullet. “Etude Des Variations Des Constituans Glucidiques Du Lait de Femme Au Cour de Lactation.” Bulletin de La Societe de Chimie Biologique, 1960.
Newburg, David S. “Carbohydrates in Milks: Analysis, Quantities and Significance.” HANDBOOK OF MILK COMPOSITION, vol. 4, no. 2, ACADEMIC PRESS, 1995, doi:10.1128/ecosalplus.7.2.6.Homologous.
Nijman, Rose M., et al. “Characterization and Quantification of Oligosaccharides in Human Milk and Infant Formula.” Journal of Agricultural and Food Chemistry, vol. 66, no. 26, American Chemical Society, 2018, pp. 6851–59, doi:10.1021/acs.jafc.8b01515.
Viverge, Daniele. “HMO Variation over First Week Lactation.” JPGN, vol. 11, no. 3, Raven Press, Ltd., New York, 1990.
Viverge, Daniele. “Variations of Lactose and Oligosaccharides in Milk from Women of Blood Types Secretor A or H, Secretor Lewis, and Secretor H/Nonsecretor Lewis during the Course of Lactation.” Ann. Nutr. Metab., 1985, p. 43.
Xu, Gege, et al. “Absolute Quantitation of Human Milk Oligosaccharides Reveals Phenotypic Variations during Lactation.” The Journal of Nutrition, vol. 147, no. 1, 2017, pp. 117–24, doi:10.3945/jn.116.238279.

## Sheet: Pie gL Mature Milk
2'-FL	2.27652
LNDFH-I (DF-LNT)	1.10137
LNFP-I	0.832973
LNFP-II	0.788635
LNT	0.734471
3-FL	0.72839
6'-SL	0.402824
DSLNT	0.379294
LNnT	0.372003
LDFT (DFL)	0.29267
FDS-LNH	0.282545
LNFP-III	0.258693
3'-SL	0.190233
LST c	0.169562
TF-LNH	0.150217
DS-LNH	0.136176
F-LNH-III	0.12
F-LNH-II	0.118808
DF-LNH I (a)	0.111975
LST b	0.100688
LNFP-V	0.0780976
LNDFH-II	0.0770556
LNH	0.0756264
S-LNFP II	0.0608391
F-LNH-I (MFLNH I)	0.0545055
DF-LNH-II	0.051
F-para-LNH I	0.049
DF-LNH III (c)	0.0462041
LNnH	0.0453506
DF-pLNnH	0.041
LST a	0.0374243
LNFP-VI	0.017
FSL (3'S-3'FL)	0.0120728
pLNH	0.009
6'SLN	0.00556522
pLNnH	0.00519481
Sum	10.213
All other	1.08375

## Sheet: Pie mmolL
Column1	Mature milk g/L	Molar weight	umol/L
2'-FL	2.27652	488.44	4660.81																																	Column1	Mature milk g/L	Molar weight	umol/L
LNDFH-I	1.10137	999.92	1101.46																																	2'-FL	2.27652	488.44	4660.81
LNFP-I	0.832973	853.77	975.641																																	3-FL	0.72839	488.44	1491.26
LNFP-II	0.788	853.77	922.965																																	LNDFH-I	1.10137	999.92	1101.46
LNT	0.734471	707.63	1037.93																																	LNT	0.734471	707.63	1037.93
3-FL	0.72839	488.44	1491.26																																	LNFP-I	0.832973	853.77	975.641
6'-SL	0.402824	633.55	635.82																																	LNFP-II	0.788	853.77	922.965
DSLNT	0.379294	1290.14	293.995																																	6'-SL	0.402824	633.55	635.82
LNnT	0.372003	707.63	525.702																																	LNnT	0.372003	707.63	525.702
DFL	0.29267	634.58	461.202																																	DFL	0.29267	634.58	461.202
F-LNH-III	0.312935	1219.1	256.694																																	LNFP-III	0.258693	853.77	303
FDS-LNH	0.282545	1801.61	156.829																																	3'-SL	0.190233	633.55	300.266
LNFP-III	0.258693	853.77	303																																	DSLNT	0.379294	1290.14	293.995
3'-SL	0.190233	633.55	300.266																																	F-LNH-III	0.312935	1219.1	256.694
LST c	0.169562	998.89	169.75																																	LST c	0.169562	998.89	169.75
TF-LNH	0.150217	1511.39	99.3902																																	FDS-LNH	0.282545	1801.61	156.829
DS-LNH	0.136176	1510.36	90.161																																	LST b	0.100688	998.89	100.8
F-LNH-II	0.118808	1219.1	97.4557																																	TF-LNH	0.150217	1511.39	99.3902
DF-LNH I (a)	0.111975	1365.25	82.0182																																	F-LNH-II	0.118808	1219.1	97.4557
LST b	0.100688	998.89	100.8																																	LNFP-V	0.0780976	853.77	91.4738
LNFP-V	0.0780976	853.77	91.4738																																	DS-LNH	0.136176	1510.36	90.161
LNDFH-II	0.0770556	999.92	77.0618																																	DF-LNH I (a)	0.111975	1365.25	82.0182
LNH	0.0756264	1072.97	70.4832																																	LNDFH-II	0.0770556	999.92	77.0618
S-LNFP II	0.0608391	1145.03	53.1332																																	LNH	0.0756264	1072.97	70.4832
F-LNH-I (MFLNH I)	0.0545055	1219.1	44.7096																																	S-LNFP II	0.0608391	1145.03	53.1332
DF-LNH-II	0.051	1365.25	37.3558																																	F-LNH-I (MFLNH I)	0.0545055	1219.1	44.7096
F-para-LNH I	0.049	1219.1	40.1936																																	LNnH	0.0453506	1072.97	42.2665
DF-LNH III (c)	0.0462041	1365.25	33.8429																																	F-para-LNH I	0.049	1219.1	40.1936
LNnH	0.0453506	1072.97	42.2665																																	LST a	0.0374243	998.89	37.4659
DF-pLNnH	0.041	1365.25	30.0311																																	DF-LNH-II	0.051	1365.25	37.3558
LST a	0.0374243	998.89	37.4659																																	DF-LNH III (c)	0.0462041	1365.25	33.8429
LNFP-VI	0.017	853.77	19.9117																																	DF-pLNnH	0.041	1365.25	30.0311
FSL (3'S-3'FL)	0.0120728	779.69	15.4841																																	LNFP-VI	0.017	853.77	19.9117
pLNH	0.009	1072.97	8.38793																																	FSL (3'S-3'FL)	0.0120728	779.69	15.4841
6'SLN	0.00556522	674.6	8.24966																																	pLNH	0.009	1072.97	8.38793
pLNnH	0.00519481	1072.97	4.84152																																	6'SLN	0.00556522	674.6	8.24966
All other	0.824	1994.66	413.102																																	pLNnH	0.00519481	1072.97	4.84152
Sum	10.4053	36901.3	14378																																	All other	0.824	1994.66	413.102
